# Supplementary material
Source: PubMed Central journal article supplement (PMC3326356)
Supplement: NIHMS365778-supplement-1_si_001.pdf [file NIHMS365778-supplement-1_si_001.pdf]

## Supplementary Information

### <sup>15</sup>N NMR relaxation results

As shown in Supplementary Figures S2 and Supplementary Tables S1-S2, the N- and C-terminal residues (i.e. residues 1-6 and 70-73, respectively) experience rapid internal fluctuations on the ps-ns time scale, as assessed by characteristically low heteronuclear <sup>15</sup>N-[<sup>1</sup>H]-nOe and spectral density function  $J_{\text{eff}}(0)$ , and  $J(0.87\omega_{\text{H}}) > 6$  ps/rad. The rapid and large amplitude internal motions observed for N- and C-terminal backbone amides are consistent with the lack of observable long-range <sup>1</sup>H-<sup>1</sup>H-nOes and near random coil chemical shifts observed for these residues, i.e. NMR features that are characteristic of disordered random-coil-like polypeptide segments.

The other backbone amides (residues 16-69) display relatively uniform relaxation profiles that are typical for well-folded segments of a protein with limited internal flexibility, except for a few subtle but potentially important differences for certain residues. The <sup>15</sup>N NMR relaxation parameters measured for the amides in helices  $\alpha 2$  and  $\alpha 3$  yield rather uniform general order parameters ( $S^2$ ) approaching 1, indicating that ps-ns internal motions of backbone atoms in these two helices are highly restricted. Interestingly, several backbone amides within the  $\alpha 1$  helix and the  $\alpha 1$ - $\alpha 2$  turn deviate slightly from this trend. In particular, residues 21, 25, 26, 29, 32, 33 and 34 display lower  $J(0.87\omega_{\text{H}})$  ( $\leq 4$ ps/rad) and higher  $J_{\text{eff}}(0)$  ( $> 5.6$  ns/rad), indicating that amides in this region may be experiencing slower  $\mu$ s-ms motions typical of chemical exchange (Figure S2). In agreement with these results, ModelFree fitting of the <sup>15</sup>N NMR relaxation data indicates that several of the same residues are best fit by invoking an  $R_{\text{ex}}$  term (1) (see Supplementary Table S3). Lastly, backbone amides within the N-terminal  $\beta$ -sheet region (residues 10-16) display elevated  $J(0.87\omega_{\text{H}})$  and low  $J_{\text{eff}}(0)$  (Fig. 10). This is similar, although not to the same extent, to

what is observed for amides in the N- and C-termini of the protein, suggesting that this region is relatively more flexible than the core of the protein and experiencing greater ps-ns NH bond vector internal motions than core amides. It is tempting to speculate that the enhanced flexibility of the DNA binding domain of E73 spanning the anti-parallel  $\beta$ -sheet region of the protein may be important for specific recognition and binding of E73's cognate DNA target.

Although ModelFree fitting of these residues yields high  $S^2$  values (i.e. restricted flexibility), several of these NH backbone amides are best fit with higher order models (models 3-5), indicating the presence of more complex motions that are not parametrized adequately by the ModelFree formalism, and therefore put into question the reliability and significance of high  $S^2$  for these residues (1).

These data are consistent with the backbone dynamics and thermostability data reported in the literature for several other RHH proteins. For example, an extensive structural and stability investigation of ORF56, a small RHH protein from the hyperthermophilic archaeon *Sulfolobus islandicus*, indicated that ORF56 possesses very similar backbone amide dynamics profiles to that of E73 and is an extremely stable protein. The GndHCl denaturation midpoint measured for ORF56 is ~5M which differs only slightly from the 4.8M denaturation midpoint of E73. In addition, the internal dynamics profile of E73, including all the measured <sup>15</sup>NMR relaxation parameters, the derived reduced spectral density functions, and the calculated Lipari-Szabo motional parameters, are almost identical to that of SvtR, a protein found in the rod-shaped virus SIRV1, which too infects *Sulfolobus islandicus*, a archeal organism thriving in acidic hot springs at 85°C. In contrast, the structural and internal dynamics studies reported by Oberer et al. (2) on the mesophilic anti-toxin protein ParD, which contains a N-terminal RHH domain, indicate that even though ParD is comprised of a well structured RHH domain in solution, this domain is

more flexible as assessed by  $^{15}\text{N}$  NMR relaxation measurements than that of E73, ORF56, or SvtR. An earlier study reported the thermodynamic characteristics of ParD (3) and revealed that the thermal denaturation mid-point ( $T_m$ ) of ParD is  $64^\circ\text{C}$  (2) which is significantly less than the thermostability and  $T_m$  of ORF56 from *Sulfolobus islandicus* (4) and E73 from SSV-RH (this study). Altogether, these data indicate that it is reasonable to correlate restricted internal flexibility with the higher thermostability of crenarchaeal proteins such as E73.

### References Cited in Supplementary Information Section

1. Mandel, A. M., Akke, M., and Palmer, A. G. (1995) Backbone dynamics of Escherichia coli ribonuclease HI: correlations with structure and function in an active enzyme, *J. Mol. Biol.* 246, 144-163.
2. Oberer, M., Zangger, K., Gruber, K., and Keller, W. (2007) The solution structure of ParD, the antidote of the ParDE toxin-antitoxin module, provides the structural basis for DNA and toxin binding, *Protein Sci.* 16, 1676-1688.
3. Oberer, M., Lindner, H., Glatter, O., Krafky, C., and Keller, W. (1999) Thermodynamic properties and DNA binding of the ParD protein from the broad host-range plasmid RK2/RP4 killing system, *J. Biol. Chem.* 380, 1413-1420.
4. Zeeb, M., Lipps, G., Lilie, H., and Balbach, J. (2004) Folding and association of an extremely stable dimeric protein from *Sulfolobus islandicus*, *J. Mol. Biol.* 336, 227-240.

### Supplementary Tables S0-S3 consist of:

**Table S0** – Parameters used in the molecular dynamics scheme (anneal.inp) and the non crystallographic symmetry (ncs.def) matrix used in the structural calculations of E73.

**Table S1** -  $^{15}\text{N}$  NMR relaxation parameters ( $^{15}\text{N-T}_1$ ,  $^{15}\text{N-T}_2$ ,  $^{15}\text{N-}\{^1\text{H}\}$ -nOe) measured for SSV-RH E73 at pH 5.0 and  $T = 312\text{K}$ .

**Table S2** - Reduced spectral density functions,  $J_{\text{eff}}(0)$ ,  $J(\omega_{\text{N}})$  and  $J(0.87\omega_{\text{H}})$ , tabulated from the  $^{15}\text{N}$  NMR relaxation data obtained for E73 at a magnetic field strength of 14.1 T.

**Table S3** - Motional parameters ( $S^2$ ,  $\tau_e$ ,  $R_{\text{ex}}$ , and model selection) computed for E73 and derived from ModelFree analysis of  $^{15}\text{N}$  NMR relaxation parameters.

### Supplementary Figures S1-S6 and Figure Legends

**Supplementary Figure S1:** Summary of amide H/D exchange data, patterns of sequential and short range NOEs, and  $^{13}\text{C}\alpha/\beta$  and  $^1\text{H}\alpha$  chemical shifts differences from random coil values for SSV-RH E73. The protein sequence is indicated on the top row using the one-letter amino acid code. Filled stars denote residues for which the amide proton exchange time constant is  $>20$  min. nOe connectivities are diagrammed in the next eight rows. The height of the box reflects the intensity of the cross-peak classified as strong (tallest), medium, weak, and very weak (shortest): sequential  $d_{\text{NN}}(i, i+1)$ ,  $d_{\alpha\text{N}}(i, i+1)$ , and  $d_{\beta\text{N}}(i, i+1)$ ; short-range  $d_{\text{NN}}(i, i+2)$ ,  $d_{\alpha\text{N}}(i, i+2)$ ,  $d_{\alpha\text{N}}(i, i+3)$ ,  $d_{\alpha\beta}(i, i+3)$ , and  $d_{\alpha\text{N}}(i, i+4)$  are depicted from the first residue involved to the appropriate downstream residue. Bottom; Differences in parts per million (ppm) in  $^1\text{H}\alpha$ ,  $^{13}\text{C}\alpha$ , and  $^{13}\text{C}\beta$  chemical shifts relative to random coil values are shown in the rows labeled  $\Delta^{13}\text{C}\alpha$ ,  $\Delta^{13}\text{C}\beta$  and  $\Delta^1\text{H}\alpha$ , respectively. The thinnest line corresponds to no significant chemical shift difference; residues for which no line is given have not been assigned  $^1\text{H}\alpha$ ,  $^{13}\text{C}\alpha$ , or  $^{13}\text{C}\beta$  chemical shifts.

Regions of the protein identified as  $\alpha$ -helices or extended  $\beta$ -strand by PROCHECK\_NMR analysis are schematically depicted in the last row.

**Supplementary Figure S2:** Spectral density functions ( $J$ ) at  $0.87\omega_H$ ,  $\omega_N$  and 0 frequencies obtained from  $^{15}\text{N}$  relaxation data measured at a magnetic field of 14.1 T and plotted against residue number (Figure S2A, S2B, and S2C, respectively). Dotted lines represent spectral density values corresponding to  $\pm$  one standard deviation.

**Supplementary Figure S3:** Conformational exchange ( $R_{ex}$ ) and order ( $S^2$ ) Lipari-Szabo parameters for E73 plotted against residue number. Secondary structure elements are depicted above each plot (cylinders =  $\alpha$ -helices and arrow =  $\beta$ -strand). Error bars indicate the uncertainties propagated from intrinsic errors in measured  $^{15}\text{N}$  relaxation data.

**Supplementary Figure S4:**  $^{15}\text{N}$  NMR relaxation parameters for E73 as a function of residue number. (A) Plot of  $^{15}\text{N}$ - $[^1\text{H}]$ -nOes; and (B)  $^{15}\text{N}$   $T_1$ - $T_2$  ratios. Plotted error bars correspond to errors reported in Tables S1, and calculated as described in Goel et al. (2010) *Biochemistry* 49, 5140-5153. Secondary structural elements of E73 are depicted as arrow ( $\beta$ -strand) and cylinders ( $\alpha$ -helices) above each plot.

**Supplementary Figure S5:** Structure-based alignment of the amino acid sequence of E73 to that of several of its closest RHH analogs including ones that contain a 3<sup>rd</sup> helix. Amino acids are depicted in their one letter code; Capital letters indicate structurally conserved residues among the different RHH proteins; Small letters indicate that these residues are not conserved among

RHH homologs. It is interesting to note that many residues that make up the 3<sup>rd</sup> helix of E73 are not conserved among other RHH proteins containing a 3<sup>rd</sup> helix, providing further evidence that the 3<sup>rd</sup> helix of E73 plays a unique structural and functional role.

The structural alignment model also highlights residues in each protomer of the E73 that may form specific contacts with major groove DNA bases, including Lys11, Thr13, Ala15 (highlighted in the open boxed areas). Conserved hydrophobic residues include Leu 14 and Phe 16 (located in the turn region between the extended  $\beta$ -strand and the  $\alpha$ 1 helix of each protomer of E73), Leu 24 (from  $\alpha$ 1), and Ile 38, Val 43, and Leu 47 (from  $\alpha$ 2) (and boxed in yellow). These residues follow the typical sequence conservation patterns identified in RHH transcription factors (reviewed in Schreiter & Drennan (2007) *Nat. Rev. Microbiol.* 5, pp. 710-720). Asterisks refer to residues that are discussed in the text regarding the superpositional docking model of E73 onto PutA DNA.

**Supplementary Figure S6:** (A) Ribbon representation of the three dimensional structure of E73 with sidechains of amino acids that may be involved in specific DNA interactions labeled in yellow. Particularly notable are the cluster of lysines (K9, K10, K11), and conserved residues T13, and A15 as the latter (i.e. K11, T13, A15) correspond to conserved residue positions 2, 4, 6 of the canonical sequence alignment characterizing RHH transcription factors (see Figure 1 of the Schreiter & Drennan (2007) review for details).

(B) Molecular surface representation of E73 indicating the location of the positively charged K11/K11' residues that have been mutated in the E73K11E variant to negatively charged glutamic acids, resulting in the abrogation of non-specific binding to viral DNA.

Figure S1

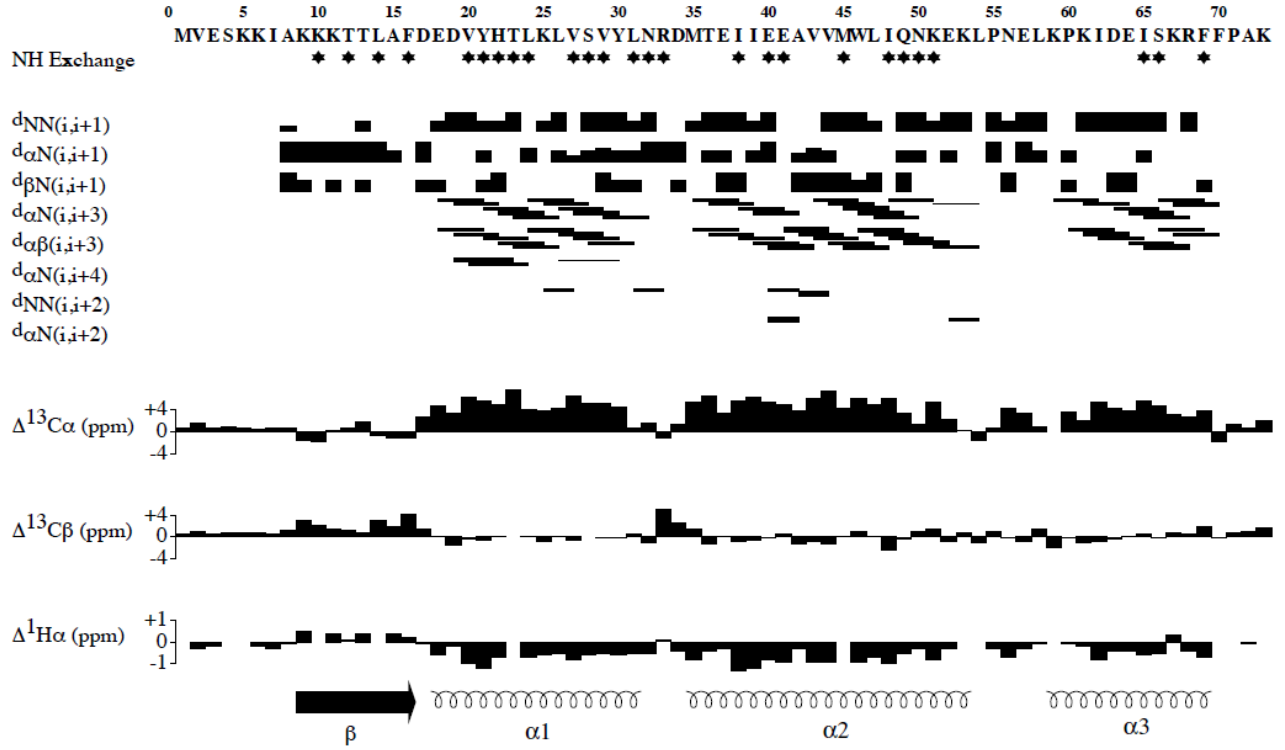

Figure S2

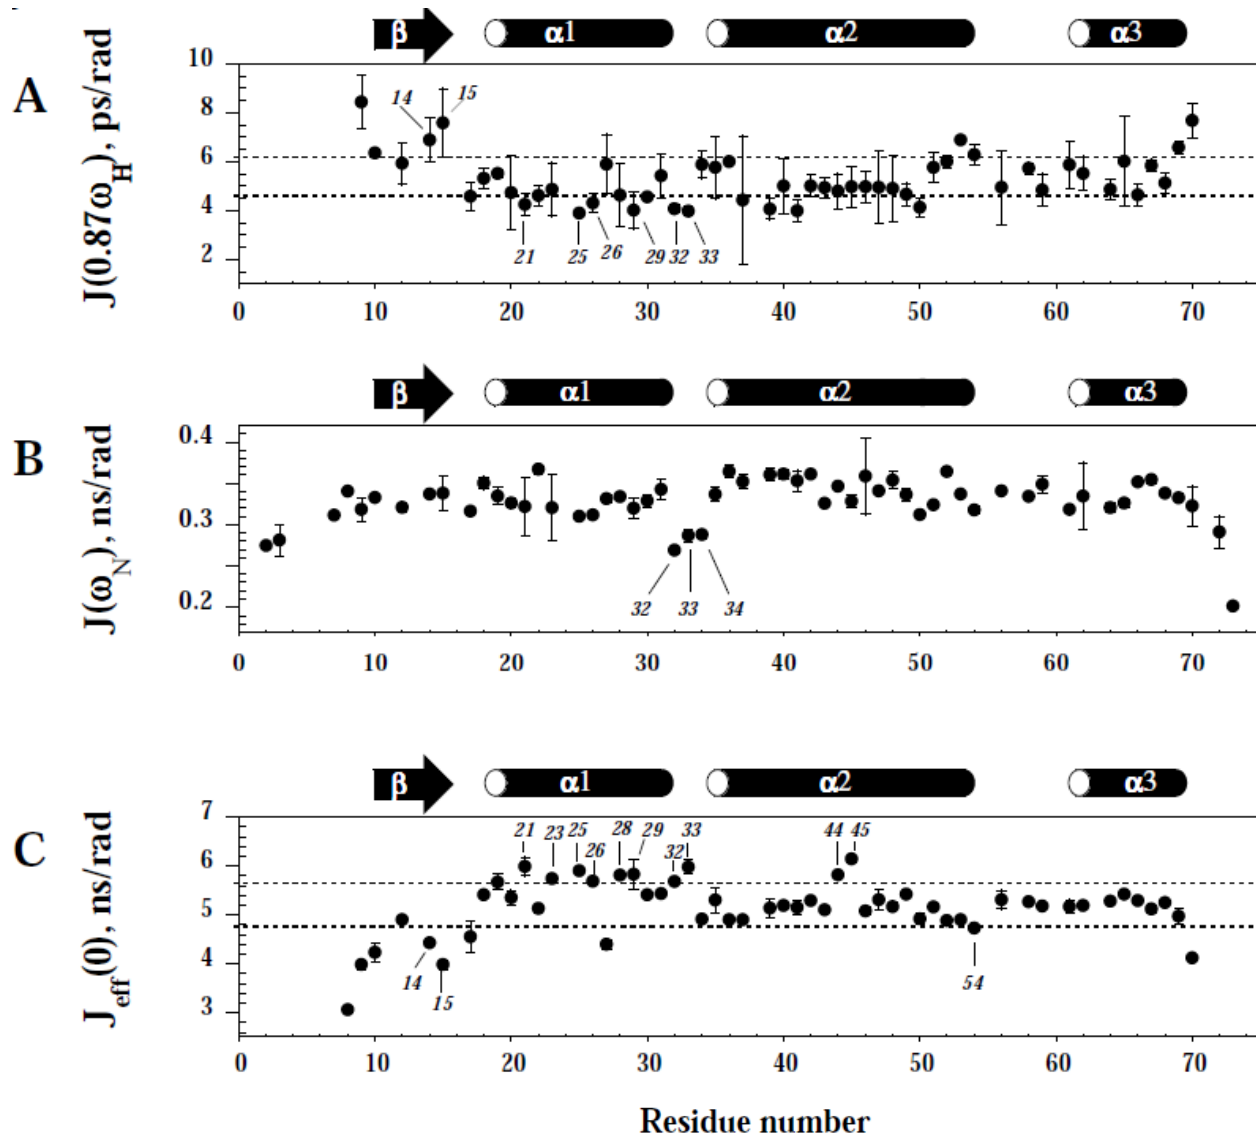



Figure S3

A

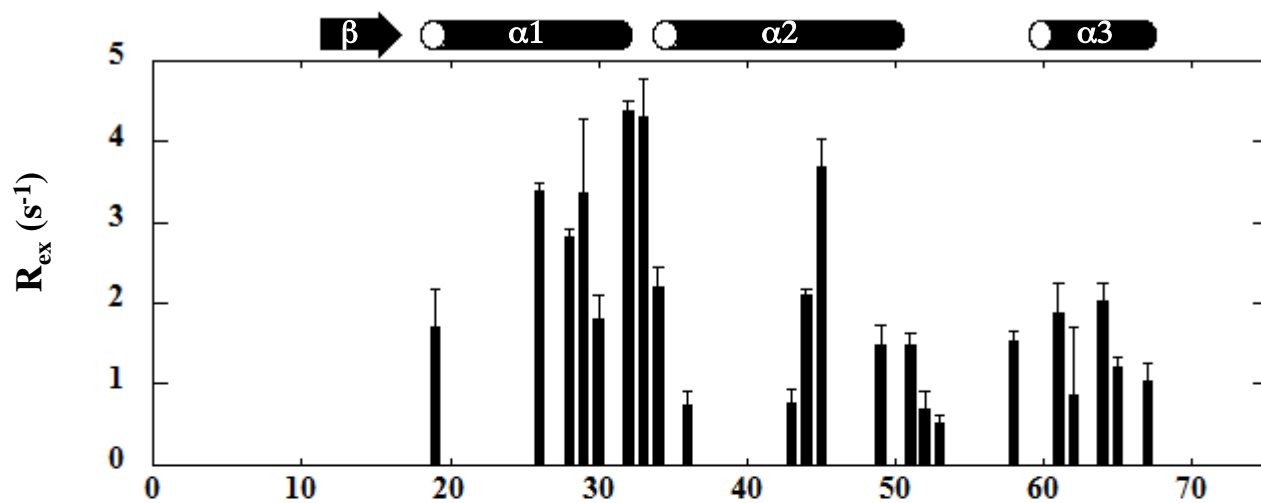

B

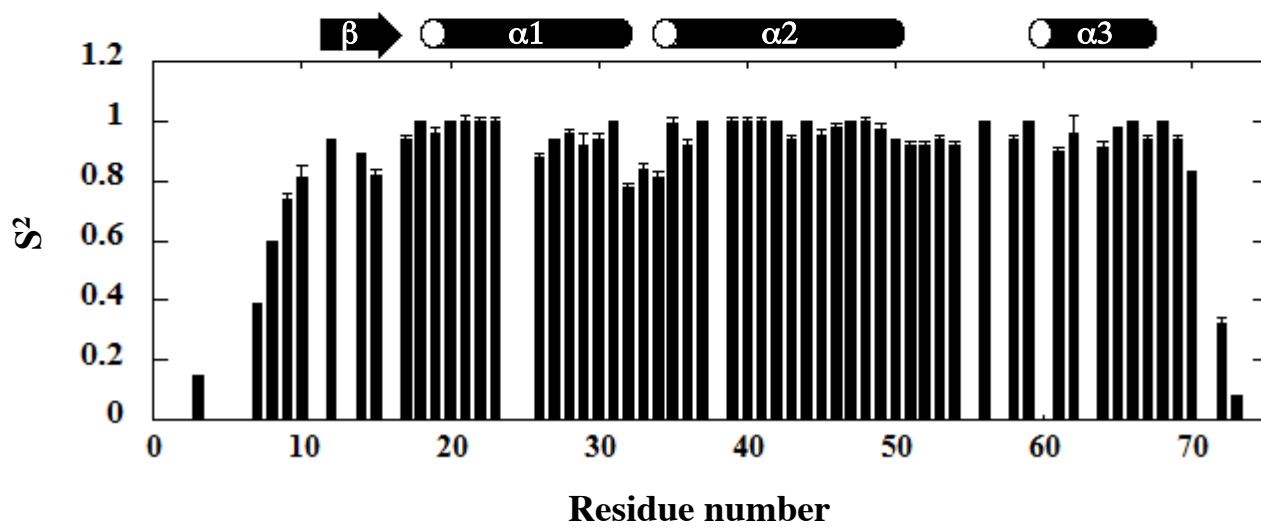

Figure S4

A

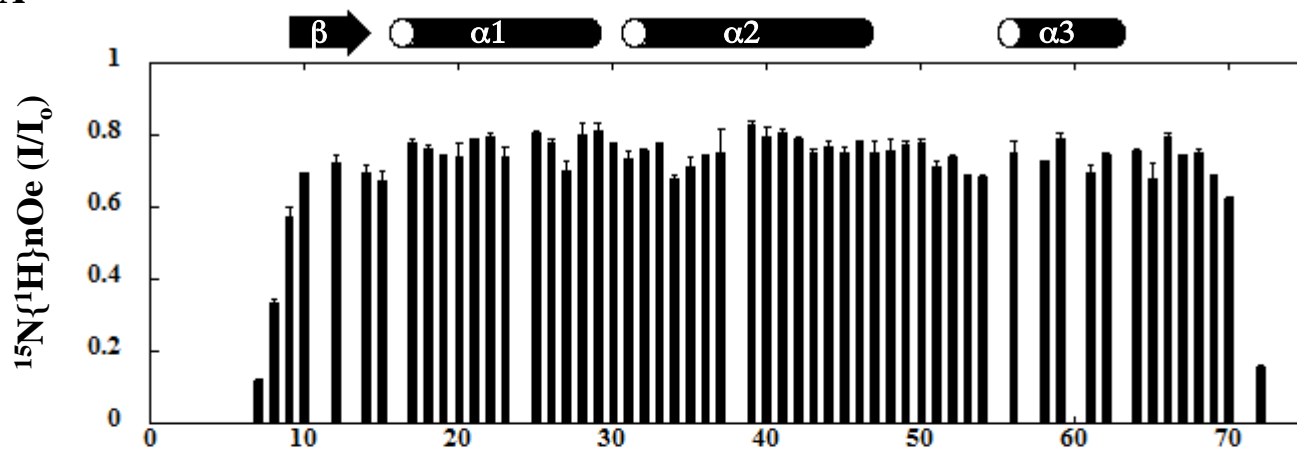

B

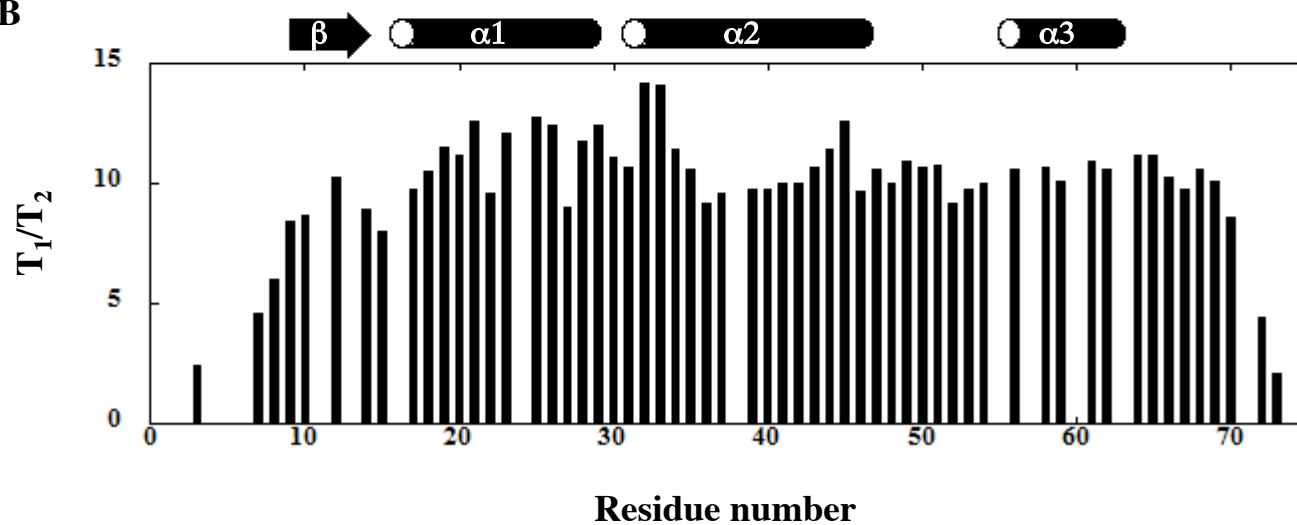

Figure S5

```

**   ***  *  *
>E73  mveskkiAKKKTTLAF DEDVYHTLKLVSFY----LN-----RDMTEIEEAVVMWLIQNK---EKL Pnelkpkideiskrffpak
>PutA  GTTTMGVKLDDATRERTKSAATR----ID-----RTPHWLIKQATFSYLEQLE---NSDT
>NikR  MORVTITLDDDLLETLDLSQR----RG-----YnNRSEAIRDILRSALAQE---ATQ
>ParD  KMPOFNLRMPREVLDLVRKVAEE----NG-----RSVNSEIYQRYMESFKKEG---R
>VirC2 eksIIVQTSRMFPVSLIEARNHFDPlgleta----rAFGHKLATAALACFARE---KATN
>SVTR  KQKAVFGIYMDKDLKTRLKVYCAK----NN-----LQLTQAIIEEATKEYLQKRN---G
>RelB  MGSINLRIDDELKARSYAALEK----MG-----VTPSEALRLMEYIADNER
>MntR  ARDDPHFNFRMPMEVREKLKFRAEA----NG-----RSMNSELLQIVQDALSKPSpvtGYRN--dAERLADEQSE--lv
>Orf56  LNGIKLGVYIPQEWHDRLMEIAKEKNLTLSD----VCRLAIKEYLDNHD
>CcdA  MKQRITVTVDSdSYQLLKAYDV.----...-----nISGLVSTTMQNEARRLR-----aERWKvenaqgmvevarfiemngsfadenkdw
>1y9b  TTLPRITARVDVDTODLAKAAAL----AG-----XsSINSFVLNAIEKAKQV---IEREgaLKL Saadavllxealdnpavvnaklklase
>MetJ  aeHGKKSEQVKKITVSIPLKVLKLTLDERT---RRKvnnlrhATNSELLCEAFLHAFTGQplpddadlrkersdeipeaakeIMREMG---inpetweyx
>ParG  TAPVSSGKIKRVNWNFDEEKHTRFKAACAR----KG-----TSITDVMNQLVDNWLKENE
>FitA  ASVVIIRLSEATHNAIKFRAR----AA-----GRSTEAIEIRLILDNLAKAQ---Q-TVRLGSMLasigqeiggvel

```

Figure S6

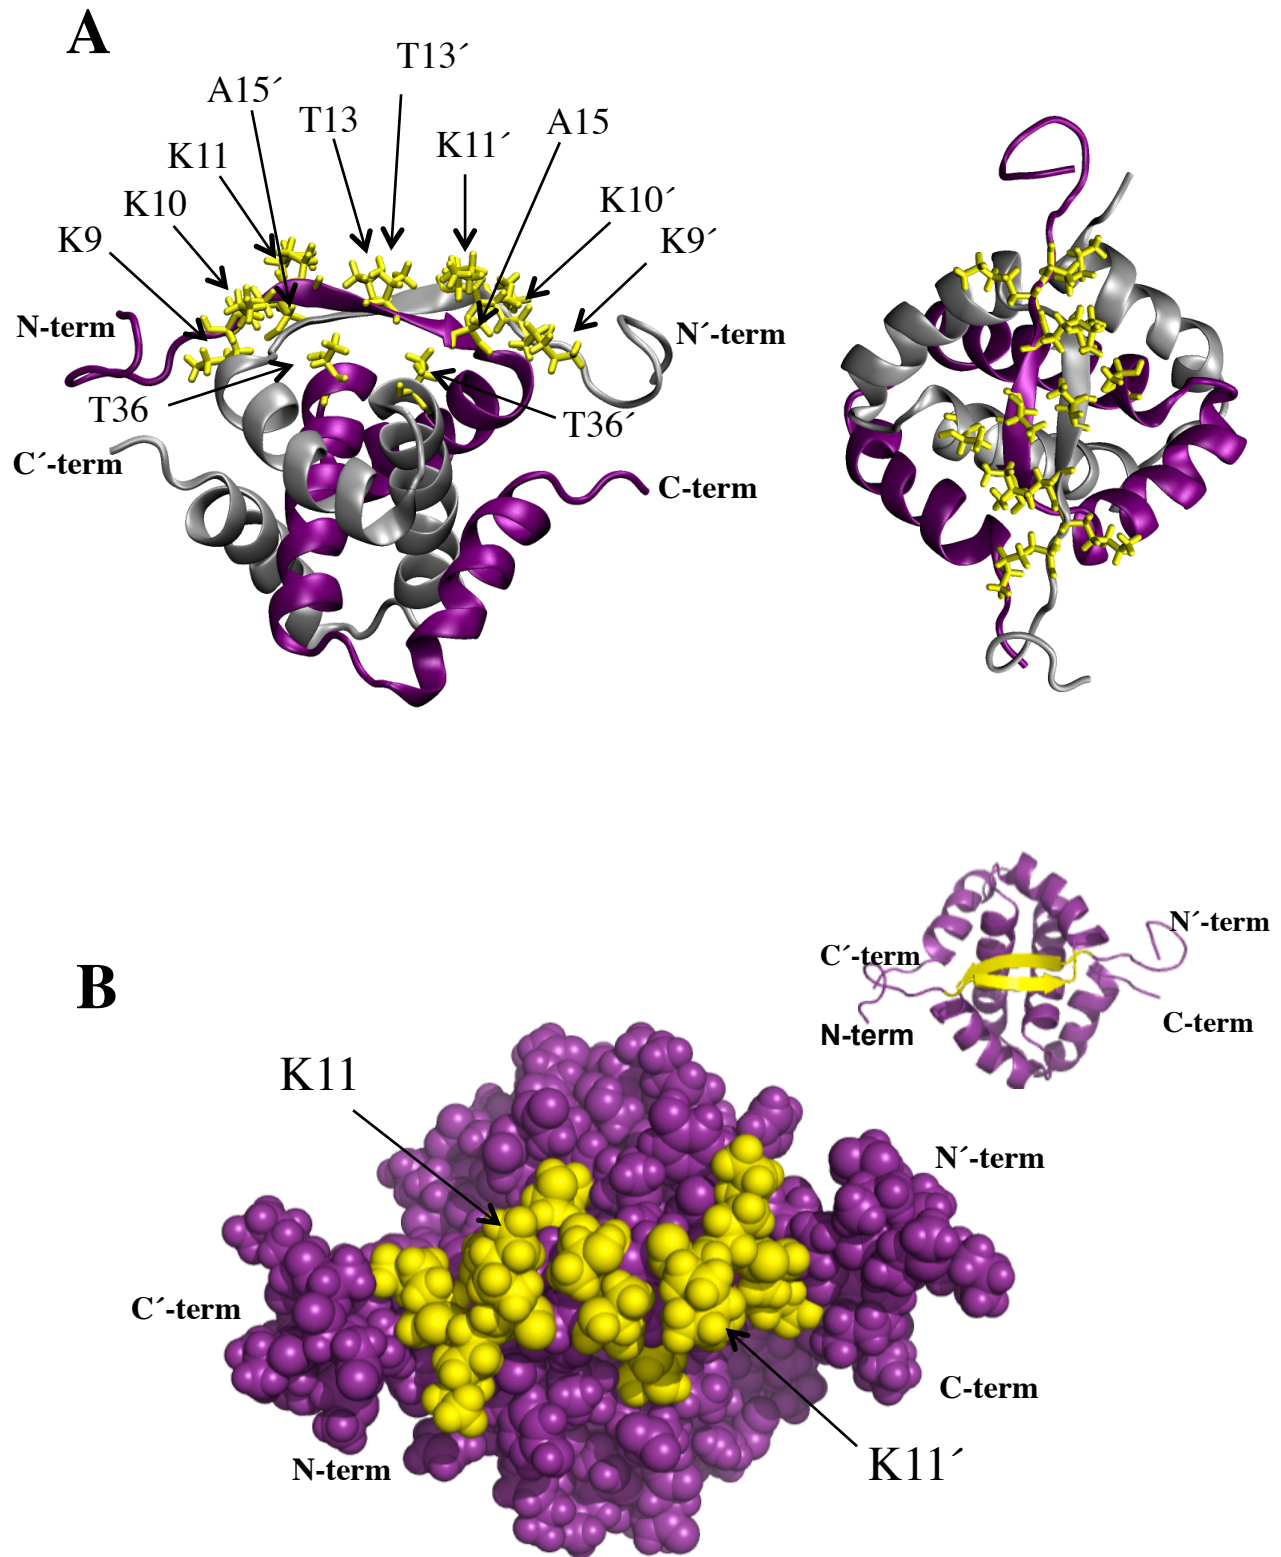

**Supplemental Table S0: Molecular Dynamics (anneal.inp) and NCS parameters used for E73 Structure Calculations**

**Simulated annealing protocol:** torsion, torsion, cartesian, minimization

**Calculated structures:** 100

**High temperature torsion dynamics:**

|                                  |          |
|----------------------------------|----------|
| temp.                            | 50,000 K |
| # steps                          | 2000     |
| time/step                        | 60 ps    |
| NOE scale factor                 | 150      |
| VDW scale factor                 | 0.1      |
| Dihedral restraints scale factor | 100      |

**1st cooling stage:**

|                                  |               |
|----------------------------------|---------------|
| temp.                            | 50,000 => 0 K |
| # steps                          | 2000;         |
| time/step                        | 60 ps         |
| temp. step                       | 250           |
| NOE scale factor                 | 150           |
| VDW scale factor                 | 0.1=>1        |
| Dihedral restraints scale factor | 200           |

**2nd cooling stage:**

|                                  |             |
|----------------------------------|-------------|
| temp.                            | 2000 => 0 K |
| # steps                          | 15,000      |
| time/step                        | 75 ps       |
| temp. step                       | 25          |
| NOE scale factor                 | 150         |
| VDW scale factor                 | 1->4        |
| Dihedral restraints scale factor | 200         |

**Minimization stage:**

|                                  |      |
|----------------------------------|------|
| # steps                          | 2000 |
| NOE scale factor                 | 75   |
| VDW scale factor                 | 1    |
| Dihedral restraints scale factor | 400  |

### Non crystallographic symmetry (NCS) Rotation Matrix

**NCS operator** (which transforms segid A and resid 10:69 and name CA => segid B and resid 10:69 and name CA)

rotation matrix = ( 0.16066 -0.82741 0.53813 )  
( -0.86939 -0.37675 -0.31972 )  
( 0.46728 -0.41648 -0.77987 )

translation vector ( 0.05499 0.24328 0.15567 )

**Table S1 –  $^{15}\text{N}$ -Relaxation parameters measured for E73 at pH 5.0 and 312 K.**

| <u>Residue</u><br><u>type</u> | <u>Residue</u><br><u>number</u> | $\frac{^{15}\text{N}-\{^1\text{H}\}}{\text{nOe (I/Io)}}$ | $\frac{^{15}\text{N}-\{^1\text{H}\}}{\text{err (I/Io)}}$ nOe | $\frac{^{15}\text{N}-T_1}{\text{(ms)}}$ | $\frac{^{15}\text{N}-T_1}{\text{error (ms)}}$ | $\frac{^{15}\text{N}-T_2}{\text{(ms)}}$ | $\frac{^{15}\text{N}-T_2}{\text{err (ms)}}$ |
|-------------------------------|---------------------------------|----------------------------------------------------------|--------------------------------------------------------------|-----------------------------------------|-----------------------------------------------|-----------------------------------------|---------------------------------------------|
| MET                           | 1                               | -                                                        | -                                                            | -                                       | -                                             | -                                       | -                                           |
| VAL                           | 2                               | -0.29                                                    | 0.01                                                         | 772.9                                   | 7.4                                           | 245.7                                   | 14.9                                        |
| GLU                           | 3                               | -0.28                                                    | 0.01                                                         | 758.1                                   | 52.5                                          | 311.1                                   | 3.7                                         |
| SER                           | 4                               | -                                                        | -                                                            | -                                       | -                                             | -                                       | -                                           |
| LYS                           | 5                               | -                                                        | -                                                            | -                                       | -                                             | -                                       | -                                           |
| LYS                           | 6                               | -                                                        | -                                                            | -                                       | -                                             | -                                       | -                                           |
| ILE                           | 7                               | 0.12                                                     | 0.01                                                         | 725.8                                   | 6.2                                           | 156.4                                   | 1.2                                         |
| ALA                           | 8                               | 0.34                                                     | 0.01                                                         | 684.7                                   | 4.0                                           | 113.7                                   | 1.8                                         |
| LYS                           | 9                               | 0.57                                                     | 0.03                                                         | 758.1                                   | 33.0                                          | 89.9                                    | 2.2                                         |
| LYS                           | 10                              | 0.70                                                     | 0.01                                                         | 734.8                                   | 0.2                                           | 84.9                                    | 3.5                                         |
| LYS                           | 11                              | -                                                        | -                                                            | -                                       | -                                             | -                                       | -                                           |
| THR                           | 12                              | 0.72                                                     | 0.02                                                         | 760.8                                   | 8.8                                           | 74.0                                    | 0.7                                         |
| THR                           | 13                              | -                                                        | -                                                            | -                                       | -                                             | -                                       | -                                           |
| LEU                           | 14                              | 0.70                                                     | 0.02                                                         | 725.7                                   | 5.7                                           | 81.1                                    | 0.2                                         |
| ALA                           | 15                              | 0.67                                                     | 0.03                                                         | 721.7                                   | 41.5                                          | 89.7                                    | 1.9                                         |
| PHE                           | 16                              | -                                                        | -                                                            | -                                       | -                                             | -                                       | -                                           |
| ASP                           | 17                              | 0.78                                                     | 0.01                                                         | 783.2                                   | 9.4                                           | 79.6                                    | 5.3                                         |
| GLU                           | 18                              | 0.76                                                     | 0.01                                                         | 705.1                                   | 14.5                                          | 67.1                                    | 0.1                                         |
| ASP                           | 19                              | 0.74                                                     | 0.01                                                         | 735.6                                   | 20.6                                          | 64.2                                    | 1.7                                         |
| VAL                           | 20                              | 0.74                                                     | 0.04                                                         | 759.3                                   | 9.9                                           | 68.0                                    | 1.8                                         |
| TYR                           | 21                              | 0.79                                                     | 0.01                                                         | 767.4                                   | 82.4                                          | 61.1                                    | 2.0                                         |
| HIS                           | 22                              | 0.80                                                     | 0.01                                                         | 675.7                                   | 7.6                                           | 70.4                                    | 1.0                                         |
| THR                           | 23                              | 0.74                                                     | 0.02                                                         | 769.4                                   | 91.9                                          | 63.6                                    | 0.5                                         |
| LEU                           | 24                              | -                                                        | -                                                            | -                                       | -                                             | -                                       | -                                           |
| LYS                           | 25                              | 0.80                                                     | 0.01                                                         | 797.6                                   | 6.8                                           | 62.2                                    | 0.3                                         |
| LEU                           | 26                              | 0.78                                                     | 0.01                                                         | 795.1                                   | 2.1                                           | 64.3                                    | 0.1                                         |
| VAL                           | 27                              | 0.70                                                     | 0.03                                                         | 739.3                                   | 10.3                                          | 81.8                                    | 1.6                                         |
| SER                           | 28                              | 0.80                                                     | 0.03                                                         | 743.3                                   | 1.6                                           | 62.8                                    | 0.1                                         |
| VAL                           | 29                              | 0.81                                                     | 0.02                                                         | 777.6                                   | 29.1                                          | 62.8                                    | 3.1                                         |
| TYR                           | 30                              | 0.78                                                     | 0.01                                                         | 749.3                                   | 15.1                                          | 67.3                                    | 0.1                                         |
| LEU                           | 31                              | 0.73                                                     | 0.02                                                         | 718.9                                   | 25.3                                          | 66.9                                    | 0.1                                         |
| ASN                           | 32                              | 0.75                                                     | 0.01                                                         | 919.2                                   | 8.3                                           | 64.7                                    | 0.3                                         |
| ARG                           | 33                              | 0.78                                                     | 0.01                                                         | 864.2                                   | 19.9                                          | 61.5                                    | 1.4                                         |
| ASP                           | 34                              | 0.68                                                     | 0.01                                                         | 847.1                                   | 10.8                                          | 74.2                                    | 0.8                                         |
| MET                           | 35                              | 0.71                                                     | 0.03                                                         | 728.5                                   | 17.0                                          | 68.6                                    | 3.2                                         |
| THR                           | 36                              | 0.75                                                     | 0.01                                                         | 675.5                                   | 11.9                                          | 73.6                                    | 0.2                                         |
| GLU                           | 37                              | 0.75                                                     | 0.06                                                         | 706.3                                   | 13.2                                          | 73.8                                    | 0.9                                         |
| ILE                           | 38                              | -                                                        | -                                                            | -                                       | -                                             | -                                       | -                                           |

| <u>Residue</u><br><u>type</u> | <u>Residue</u><br><u>number</u> | $\frac{^{15}\text{N}-\{^1\text{H}\}}{\text{nOe (I/Io)}}$ | $\frac{^{15}\text{N}-\{^1\text{H}\} \text{ nOe}}{\text{error (I/Io)}}$ | $\frac{^{15}\text{N}-\text{T}_1}{(\text{ms})}$ | $\frac{^{15}\text{N}-\text{T}_1}{\text{error (ms)}}$ | $\frac{^{15}\text{N}-\text{T}_2}{(\text{ms})}$ | $\frac{^{15}\text{N}-\text{T}_2}{\text{error (ms)}}$ |
|-------------------------------|---------------------------------|----------------------------------------------------------|------------------------------------------------------------------------|------------------------------------------------|------------------------------------------------------|------------------------------------------------|------------------------------------------------------|
| ILE                           | 39                              | 0.83                                                     | 0.01                                                                   | 690.7                                          | 13.9                                                 | 70.5                                           | 2.5                                                  |
| GLU                           | 40                              | 0.80                                                     | 0.02                                                                   | 683.4                                          | 7.8                                                  | 69.7                                           | 0.7                                                  |
| GLU                           | 41                              | 0.81                                                     | 0.01                                                                   | 702.3                                          | 26.8                                                 | 70.3                                           | 1.7                                                  |
| ALA                           | 42                              | 0.79                                                     | 0.01                                                                   | 683.1                                          | 1.8                                                  | 68.5                                           | 0.7                                                  |
| VAL                           | 43                              | 0.75                                                     | 0.01                                                                   | 760.1                                          | 8.4                                                  | 71.2                                           | 0.6                                                  |
| VAL                           | 44                              | 0.77                                                     | 0.02                                                                   | 716.0                                          | 5.2                                                  | 62.6                                           | 0.2                                                  |
| MET                           | 45                              | 0.75                                                     | 0.02                                                                   | 753.0                                          | 15.2                                                 | 59.6                                           | 0.5                                                  |
| TRP                           | 46                              | 0.78                                                     | 0.01                                                                   | 690.2                                          | 89.7                                                 | 71.2                                           | 0.8                                                  |
| LEU                           | 47                              | 0.75                                                     | 0.03                                                                   | 727.3                                          | 1.2                                                  | 68.5                                           | 2.4                                                  |
| ILE                           | 48                              | 0.76                                                     | 0.03                                                                   | 701.7                                          | 20.2                                                 | 70.0                                           | 1.1                                                  |
| GLN                           | 49                              | 0.77                                                     | 0.01                                                                   | 734.5                                          | 15.0                                                 | 67.2                                           | 0.4                                                  |
| ASN                           | 50                              | 0.78                                                     | 0.01                                                                   | 791.5                                          | 11.0                                                 | 73.9                                           | 1.7                                                  |
| LYS                           | 51                              | 0.71                                                     | 0.02                                                                   | 758.7                                          | 6.9                                                  | 70.5                                           | 0.4                                                  |
| GLU                           | 52                              | 0.74                                                     | 0.01                                                                   | 676.0                                          | 8.8                                                  | 73.8                                           | 0.8                                                  |
| LYS                           | 53                              | 0.69                                                     | 0.01                                                                   | 725.6                                          | 7.7                                                  | 73.8                                           | 0.3                                                  |
| LEU                           | 54                              | 0.68                                                     | 0.01                                                                   | 767.7                                          | 8.9                                                  | 76.6                                           | 0.6                                                  |
| PRO                           | 55                              | -                                                        | -                                                                      | -                                              | -                                                    | -                                              | -                                                    |
| ASN                           | 56                              | 0.75                                                     | 0.03                                                                   | 727.3                                          | 1.2                                                  | 68.5                                           | 2.4                                                  |
| GLU                           | 57                              | -                                                        | -                                                                      | -                                              | -                                                    | -                                              | -                                                    |
| LEU                           | 58                              | 0.73                                                     | 0.01                                                                   | 734.8                                          | 7.8                                                  | 68.9                                           | 0.3                                                  |
| LYS                           | 59                              | 0.79                                                     | 0.01                                                                   | 708.6                                          | 17.6                                                 | 69.9                                           | 0.1                                                  |
| PRO                           | 60                              | -                                                        | -                                                                      | -                                              | -                                                    | -                                              | -                                                    |
| LYS                           | 61                              | 0.69                                                     | 0.02                                                                   | 767.5                                          | 0.4                                                  | 70.3                                           | 1.7                                                  |
| ILE                           | 62                              | 0.74                                                     | 0.01                                                                   | 737.6                                          | 93.3                                                 | 69.9                                           | 0.9                                                  |
| ASP                           | 63                              | -                                                        | -                                                                      | -                                              | -                                                    | -                                              | -                                                    |
| GLU                           | 64                              | 0.75                                                     | 0.01                                                                   | 772.2                                          | 13.1                                                 | 68.9                                           | 0.5                                                  |
| ILE                           | 65                              | 0.68                                                     | 0.05                                                                   | 753.3                                          | 7.6                                                  | 67.1                                           | 0.2                                                  |
| SER                           | 66                              | 0.79                                                     | 0.01                                                                   | 705.9                                          | 3.1                                                  | 68.6                                           | 0.4                                                  |
| LYS                           | 67                              | 0.74                                                     | 0.00                                                                   | 692.2                                          | 9.6                                                  | 70.6                                           | 0.9                                                  |
| ARG                           | 68                              | 0.75                                                     | 0.01                                                                   | 731.4                                          | 4.0                                                  | 69.1                                           | 0.6                                                  |
| PHE                           | 69                              | 0.69                                                     | 0.01                                                                   | 733.8                                          | 10.2                                                 | 72.9                                           | 2.1                                                  |
| PHE                           | 70                              | 0.62                                                     | 0.01                                                                   | 749.9                                          | 59.0                                                 | 87.1                                           | 0.4                                                  |
| PRO                           | 71                              | -                                                        | -                                                                      | -                                              | -                                                    | -                                              | -                                                    |
| ALA                           | 72                              | 0.16                                                     | 0.01                                                                   | 779.6                                          | 50.7                                                 | 177.1                                          | 5.0                                                  |
| LYS                           | 73                              | -0.64                                                    | 0.01                                                                   | 1003.2                                         | 9.7                                                  | 471.1                                          | 1.6                                                  |



**Table S2. Spectral density values for E73 measured at 14.1 T.**

| <u>Residue type</u> | <u>Residue no.</u> | <u><math>J_{\text{eff}}(0)</math>, ns/rad</u> | <u><math>J(\omega_N)</math>, ns/rad</u> | <u><math>J(0.87\omega_H)</math>, ps/rad</u> |
|---------------------|--------------------|-----------------------------------------------|-----------------------------------------|---------------------------------------------|
| MET                 | 1                  | -                                             | -                                       | -                                           |
| VAL                 | 2                  | 1.28 ± 0.10                                   | 0.27 ± 0.01                             | 25.96 ± 0.30                                |
| GLU                 | 3                  | 0.94 ± 0.02                                   | 0.28 ± 0.02                             | 26.35 ± 1.78                                |
| SER                 | 4                  | -                                             | -                                       | -                                           |
| LYS                 | 5                  | -                                             | -                                       | -                                           |
| LYS                 | 6                  | -                                             | -                                       | -                                           |
| ILE                 | 7                  | 2.16 ± 0.02                                   | 0.31 ± 0.01                             | 19.16 ± 0.26                                |
| ALA                 | 8                  | 3.06 ± 0.05                                   | 0.34 ± 0.01                             | 15.03 ± 0.46                                |
| LYS                 | 9                  | 3.98 ± 0.10                                   | 0.32 ± 0.01                             | 8.44 ± 1.09                                 |
| LYS                 | 10                 | 4.23 ± 0.18                                   | 0.33 ± 0.01                             | 6.36 ± 0.01                                 |
| LYS                 | 11                 | -                                             | -                                       | -                                           |
| THR                 | 12                 | 4.90 ± 0.05                                   | 0.32 ± 0.01                             | 5.93 ± 0.86                                 |
| THR                 | 13                 | -                                             | -                                       | -                                           |
| LEU                 | 14                 | 4.43 ± 0.01                                   | 0.34 ± 0.01                             | 6.89 ± 0.89                                 |
| ALA                 | 15                 | 3.98 ± 0.10                                   | 0.34 ± 0.02                             | 7.59 ± 1.40                                 |
| PHE                 | 16                 | -                                             | -                                       | -                                           |
| ASP                 | 17                 | 4.55 ± 0.32                                   | 0.32 ± 0.01                             | 4.59 ± 0.58                                 |
| GLU                 | 18                 | 5.41 ± 0.01                                   | 0.35 ± 0.01                             | 5.32 ± 0.44                                 |
| ASP                 | 19                 | 5.67 ± 0.16                                   | 0.33 ± 0.01                             | 5.52 ± 0.17                                 |
| VAL                 | 20                 | 5.35 ± 0.15                                   | 0.33 ± 0.01                             | 4.74 ± 1.51                                 |
| TYR                 | 21                 | 5.99 ± 0.19                                   | 0.32 ± 0.03                             | 4.26 ± 0.46                                 |
| HIS                 | 22                 | 5.13 ± 0.08                                   | 0.37 ± 0.01                             | 4.62 ± 0.43                                 |
| THR                 | 23                 | 5.74 ± 0.05                                   | 0.32 ± 0.04                             | 4.87 ± 1.09                                 |
| LEU                 | 24                 | -                                             | -                                       | -                                           |
| LYS                 | 25                 | 5.90 ± 0.03                                   | 0.31 ± 0.01                             | 3.90 ± 0.19                                 |
| LEU                 | 26                 | 5.69 ± 0.01                                   | 0.31 ± 0.01                             | 4.32 ± 0.40                                 |
| VAL                 | 27                 | 4.40 ± 0.09                                   | 0.33 ± 0.01                             | 5.90 ± 1.22                                 |
| SER                 | 28                 | 5.81 ± 0.00                                   | 0.33 ± 0.01                             | 4.63 ± 1.30                                 |
| VAL                 | 29                 | 5.83 ± 0.31                                   | 0.32 ± 0.01                             | 4.02 ± 0.76                                 |
| TYR                 | 30                 | 5.41 ± 0.01                                   | 0.33 ± 0.01                             | 4.56 ± 0.10                                 |
| LEU                 | 31                 | 5.43 ± 0.01                                   | 0.34 ± 0.01                             | 5.42 ± 0.91                                 |
| ASN                 | 32                 | 5.68 ± 0.02                                   | 0.27 ± 0.01                             | 4.08 ± 0.17                                 |
| ARG                 | 33                 | 5.98 ± 0.14                                   | 0.29 ± 0.01                             | 3.98 ± 0.20                                 |
| ASP                 | 34                 | 4.91 ± 0.06                                   | 0.29 ± 0.01                             | 5.89 ± 0.56                                 |
| MET                 | 35                 | 5.30 ± 0.25                                   | 0.34 ± 0.01                             | 5.77 ± 1.28                                 |
| THR                 | 36                 | 4.90 ± 0.02                                   | 0.36 ± 0.01                             | 6.00 ± 0.12                                 |
| GLU                 | 37                 | 4.90 ± 0.06                                   | 0.35 ± 0.01                             | 4.43 ± 2.63                                 |
| ILE                 | 38                 | -                                             | -                                       | -                                           |
| ILE                 | 39                 | 5.14 ± 0.19                                   | 0.36 ± 0.01                             | 4.07 ± 0.42                                 |

| <u>Residue type</u> | <u>Residue no.</u> | <u><math>J_{\text{eff}}(0)</math>, ns/rad</u> | <u><math>J(\omega_N)</math>, ns/rad</u> | <u><math>J(0.87\omega_H)</math>, ps/rad</u> |
|---------------------|--------------------|-----------------------------------------------|-----------------------------------------|---------------------------------------------|
| GLU                 | 41                 | 5.15 ± 0.14                                   | 0.35 ± 0.01                             | 3.99 ± 0.46                                 |
| ALA                 | 42                 | 5.29 ± 0.06                                   | 0.36 ± 0.01                             | 5.01 ± 0.45                                 |
| VAL                 | 43                 | 5.10 ± 0.05                                   | 0.33 ± 0.01                             | 4.94 ± 0.40                                 |
| VAL                 | 44                 | 5.82 ± 0.02                                   | 0.35 ± 0.01                             | 4.80 ± 0.71                                 |
| MET                 | 45                 | 6.14 ± 0.06                                   | 0.33 ± 0.01                             | 4.98 ± 0.83                                 |
| TRP                 | 46                 | 5.08 ± 0.07                                   | 0.36 ± 0.05                             | 4.98 ± 0.64                                 |
| LEU                 | 47                 | 5.31 ± 0.20                                   | 0.34 ± 0.01                             | 4.95 ± 1.48                                 |
| ILE                 | 48                 | 5.17 ± 0.08                                   | 0.35 ± 0.01                             | 4.91 ± 1.34                                 |
| GLN                 | 49                 | 5.42 ± 0.04                                   | 0.34 ± 0.01                             | 4.67 ± 0.45                                 |
| ASN                 | 50                 | 4.92 ± 0.12                                   | 0.31 ± 0.01                             | 4.13 ± 0.40                                 |
| LYS                 | 51                 | 5.16 ± 0.03                                   | 0.32 ± 0.01                             | 5.77 ± 0.63                                 |
| GLU                 | 52                 | 4.88 ± 0.06                                   | 0.36 ± 0.01                             | 6.00 ± 0.26                                 |
| LYS                 | 53                 | 4.90 ± 0.02                                   | 0.34 ± 0.01                             | 6.89 ± 0.05                                 |
| LEU                 | 54                 | 4.73 ± 0.04                                   | 0.32 ± 0.01                             | 6.29 ± 0.43                                 |
| PRO                 | 55                 | -                                             | -                                       | -                                           |
| ASN                 | 56                 | 5.31 ± 0.19                                   | 0.34 ± 0.01                             | 4.95 ± 1.52                                 |
| GLU                 | 57                 | -                                             | -                                       | -                                           |
| LEU                 | 58                 | 5.27 ± 0.02                                   | 0.33 ± 0.01                             | 5.73 ± 0.23                                 |
| LYS                 | 59                 | 5.18 ± 0.01                                   | 0.35 ± 0.01                             | 4.84 ± 0.67                                 |
| PRO                 | 60                 | -                                             | -                                       | -                                           |
| LYS                 | 61                 | 5.17 ± 0.14                                   | 0.32 ± 0.01                             | 5.88 ± 0.97                                 |
| ILE                 | 62                 | 5.19 ± 0.07                                   | 0.33 ± 0.04                             | 5.52 ± 0.70                                 |
| ASP                 | 63                 | -                                             | -                                       | -                                           |
| GLU                 | 64                 | 5.28 ± 0.04                                   | 0.32 ± 0.01                             | 4.87 ± 0.39                                 |
| ILE                 | 65                 | 5.42 ± 0.02                                   | 0.33 ± 0.01                             | 6.02 ± 1.85                                 |
| SER                 | 66                 | 5.29 ± 0.04                                   | 0.35 ± 0.01                             | 4.65 ± 0.43                                 |
| LYS                 | 67                 | 5.12 ± 0.07                                   | 0.35 ± 0.01                             | 5.84 ± 0.25                                 |
| ARG                 | 68                 | 5.25 ± 0.05                                   | 0.34 ± 0.01                             | 5.13 ± 0.42                                 |
| PHE                 | 69                 | 4.97 ± 0.15                                   | 0.33 ± 0.01                             | 6.58 ± 0.23                                 |
| PHE                 | 70                 | 4.12 ± 0.03                                   | 0.32 ± 0.02                             | 7.68 ± 0.69                                 |
| PRO                 | 71                 | -                                             | -                                       | -                                           |
| ALA                 | 72                 | 1.89 ± 0.06                                   | 0.29 ± 0.02                             | 16.77 ± 1.10                                |
| LYS                 | 73                 | 0.59 ± 0.01                                   | 0.20 ± 0.01                             | 25.58 ± 0.30                                |

Table S3 – Motional parameters computed for E73 using Model-free analysis.

| <u>Residue</u><br><u>type</u> | <u>Residue</u><br><u>number</u> | <u>Model</u> | <u>S<sup>2</sup></u> | <u>S<sup>2</sup><sub>err</sub></u> | <u>S<sup>2</sup><sub>f</sub></u> | <u>S<sup>2</sup><sub>f_err</sub></u> | <u>S<sup>2</sup><sub>s</sub></u> | <u>S<sup>2</sup><sub>s_err</sub></u> | <u>τ<sub>e</sub> (ns)</u> | <u>τ<sub>e_err</sub> (ns)</u> | <u>R<sub>ex</sub> (s<sup>-1</sup>)</u> | <u>R<sub>ex_err</sub></u><br><u>(s<sup>-1</sup>)</u> |
|-------------------------------|---------------------------------|--------------|----------------------|------------------------------------|----------------------------------|--------------------------------------|----------------------------------|--------------------------------------|---------------------------|-------------------------------|----------------------------------------|------------------------------------------------------|
| MET                           | 1                               | -            | -                    | -                                  | -                                | -                                    | -                                | -                                    | -                         | -                             | -                                      | -                                                    |
| VAL                           | 2                               | 5            | 0.22                 | 0.02                               | 0.79                             | 0.01                                 | 0.28                             | 0.03                                 | 772                       | 20                            | -                                      | -                                                    |
| GLU                           | 3                               | 5            | 0.14                 | 0.01                               | 0.76                             | 0.04                                 | 0.18                             | 0.02                                 | 847                       | 16                            | -                                      | -                                                    |
| SER                           | 4                               | -            | -                    | -                                  | -                                | -                                    | -                                | -                                    | -                         | -                             | -                                      | -                                                    |
| LYS                           | 5                               | -            | -                    | -                                  | -                                | -                                    | -                                | -                                    | -                         | -                             | -                                      | -                                                    |
| LYS                           | 6                               | -            | -                    | -                                  | -                                | -                                    | -                                | -                                    | -                         | -                             | -                                      | -                                                    |
| ILE                           | 7                               | 5            | 0.39                 | 0.01                               | 0.84                             | 0.01                                 | 0.46                             | 0.01                                 | 914                       | 10                            | -                                      | -                                                    |
| ALA                           | 8                               | 5            | 0.56                 | 0.01                               | 0.91                             | 0.01                                 | 0.61                             | 0.01                                 | 1009                      | 33                            | -                                      | -                                                    |
| LYS                           | 9                               | 5            | 0.77                 | 0.02                               | 0.91                             | 0.02                                 | 0.84                             | 0.03                                 | 919                       | 233                           | -                                      | -                                                    |
| LYS                           | 10                              | 5            | 0.82                 | 0.04                               | 0.92                             | 0.02                                 | 0.89                             | 0.02                                 | 1267                      | 225                           | -                                      | -                                                    |
| LYS                           | 11                              | -            | -                    | -                                  | -                                | -                                    | -                                | -                                    | -                         | -                             | -                                      | -                                                    |
| THR                           | 12                              | 1            | 0.96                 | 0.01                               | -                                | -                                    | 0.96                             | 0.01                                 | -                         | -                             | -                                      | -                                                    |
| THR                           | 13                              | -            | -                    | -                                  | -                                | -                                    | -                                | -                                    | -                         | -                             | -                                      | -                                                    |
| LEU                           | 14                              | 5            | 0.88                 | 0.01                               | 0.96                             | 0.01                                 | 0.91                             | 0.01                                 | 846                       | 231                           | -                                      | -                                                    |
| ALA                           | 15                              | 5            | 0.75                 | 0.02                               | 0.91                             | 0.01                                 | 0.83                             | 0.04                                 | 1333                      | 872                           | -                                      | -                                                    |
| PHE                           | 16                              | -            | -                    | -                                  | -                                | -                                    | -                                | -                                    | -                         | -                             | -                                      | -                                                    |
| ASP                           | 17                              | 1            | 0.93                 | 0.01                               | -                                | -                                    | 0.93                             | 0.01                                 | -                         | -                             | -                                      | -                                                    |
| GLU                           | 18                              | 1            | 1.00                 | 0.01                               | -                                | -                                    | 1.00                             | 0.01                                 | -                         | -                             | -                                      | -                                                    |
| ASP                           | 19                              | 4            | 0.97                 | 0.02                               | -                                | -                                    | 0.97                             | 0.02                                 | 222                       | 387                           | 1.9                                    | 0.5                                                  |
| VAL                           | 20                              | 3            | 0.93                 | 0.01                               | -                                | -                                    | 0.93                             | 0.01                                 | -                         | -                             | 1.9                                    | 0.4                                                  |
| TYR                           | 21                              | 4            | 0.89                 | 0.06                               | -                                | -                                    | 0.89                             | 0.06                                 | 15                        | 532                           | 4.6                                    | 0.9                                                  |
| HIS                           | 22                              | 1            | 1.00                 | 0.01                               | -                                | -                                    | 1.00                             | 0.01                                 | -                         | -                             | -                                      | -                                                    |
| THR                           | 23                              | 1            | 1.00                 | 0.01                               | -                                | -                                    | 1.00                             | 0.01                                 | -                         | -                             | -                                      | -                                                    |
| LEU                           | 24                              | -            | -                    | -                                  | -                                | -                                    | -                                | -                                    | -                         | -                             | -                                      | -                                                    |
| LYS                           | 25                              | -            | -                    | -                                  | -                                | -                                    | -                                | -                                    | -                         | -                             | -                                      | -                                                    |
| LEU                           | 26                              | 4            | 0.89                 | 0.01                               | -                                | -                                    | 0.89                             | 0.01                                 | 19                        | 7                             | 3.4                                    | 0.1                                                  |
| VAL                           | 27                              | 1            | 0.93                 | 0.01                               | -                                | -                                    | 0.93                             | 0.01                                 | -                         | -                             | -                                      | -                                                    |
| SER                           | 28                              | 3            | 0.92                 | 0.01                               | -                                | -                                    | 0.92                             | 0.01                                 | -                         | -                             | 3.8                                    | 0.1                                                  |
| VAL                           | 29                              | 3            | 0.89                 | 0.03                               | -                                | -                                    | 0.89                             | 0.03                                 | -                         | -                             | 4.0                                    | 0.9                                                  |
| TYR                           | 30                              | 4            | 0.93                 | 0.02                               | -                                | -                                    | 0.93                             | 0.02                                 | 34                        | 53                            | 2.1                                    | 0.3                                                  |
| LEU                           | 31                              | 4            | 0.95                 | 0.03                               | -                                | -                                    | 0.95                             | 0.03                                 | 87                        | 401                           | 2.2                                    | 0.4                                                  |
| ASN                           | 32                              | 4            | 0.76                 | 0.01                               | -                                | -                                    | 0.76                             | 0.01                                 | 12                        | 2                             | 5.0                                    | 0.1                                                  |
| ARG                           | 33                              | 4            | 0.81                 | 0.02                               | -                                | -                                    | 0.81                             | 0.02                                 | 11                        | 2                             | 5.1                                    | 0.4                                                  |
| ASP                           | 34                              | 4            | 0.79                 | 0.02                               | -                                | -                                    | 0.79                             | 0.02                                 | 33                        | 7                             | 2.8                                    | 0.2                                                  |
| MET                           | 35                              | 1            | 1.00                 | 0.01                               | -                                | -                                    | 1.00                             | 0.01                                 | -                         | -                             | -                                      | -                                                    |

| <u>Residue</u><br><u>type</u> | <u>Residue</u><br><u>number</u> | <u>Model</u> | <u>S<sup>2</sup></u> | <u>S<sup>2</sup> err</u> | <u>S<sub>f</sub><sup>2</sup></u> | <u>S<sub>f</sub><sup>2</sup> err</u> | <u>S<sub>s</sub><sup>2</sup></u> | <u>S<sub>s</sub><sup>2</sup> err</u> | <u>τ<sub>e</sub> (ns)</u> | <u>τ<sub>e</sub> err (ns)</u> | <u>R<sub>ex</sub> (s<sup>-1</sup>)</u> | <u>R<sub>ex</sub> err</u><br><u>(s<sup>-1</sup>)</u> |
|-------------------------------|---------------------------------|--------------|----------------------|--------------------------|----------------------------------|--------------------------------------|----------------------------------|--------------------------------------|---------------------------|-------------------------------|----------------------------------------|------------------------------------------------------|
| THR                           | 36                              | 4            | 0.90                 | 0.02                     | -                                | -                                    | 0.90                             | 0.02                                 | 1659                      | 195                           | 0.5                                    | 0.2                                                  |
| GLU                           | 37                              | 2            | 0.94                 | 0.01                     | -                                | -                                    | 0.94                             | 0.01                                 | 1409                      | 481                           | -                                      | -                                                    |
| ILE                           | 38                              | -            | -                    | -                        | -                                | -                                    | -                                | -                                    | -                         | -                             | -                                      | -                                                    |
| ILE                           | 39                              | 1            | 1.00                 | 0.01                     | -                                | -                                    | 1.00                             | 0.01                                 | -                         | -                             | -                                      | -                                                    |
| GLU                           | 40                              | 1            | 1.00                 | 0.01                     | -                                | -                                    | 1.00                             | 0.01                                 | -                         | -                             | -                                      | -                                                    |
| GLU                           | 41                              | 1            | 1.00                 | 0.01                     | -                                | -                                    | 1.00                             | 0.01                                 | -                         | -                             | -                                      | -                                                    |
| ALA                           | 42                              | 1            | 1.00                 | 0.01                     | -                                | -                                    | 1.00                             | 0.00                                 | -                         | -                             | -                                      | -                                                    |
| VAL                           | 43                              | 1            | 0.98                 | 0.01                     | -                                | -                                    | 0.98                             | 0.01                                 | -                         | -                             | -                                      | -                                                    |
| VAL                           | 44                              | -            | -                    | -                        | -                                | -                                    | -                                | -                                    | -                         | -                             | -                                      | -                                                    |
| MET                           | 45                              | 3            | 0.98                 | 0.02                     | -                                | -                                    | 0.98                             | 0.02                                 | -                         | -                             | 2.8                                    | 0.3                                                  |
| TRP                           | 46                              | 2            | 0.98                 | 0.01                     | -                                | -                                    | 0.98                             | 0.01                                 | 500                       | 419                           | -                                      | -                                                    |
| LEU                           | 47                              | 1            | 1.00                 | 0.01                     | -                                | -                                    | 1.00                             | 0.01                                 | -                         | -                             | -                                      | -                                                    |
| ILE                           | 48                              | 1            | 1.00                 | 0.01                     | -                                | -                                    | 1.00                             | 0.01                                 | -                         | -                             | -                                      | -                                                    |
| GLN                           | 49                              | 1            | 1.00                 | 0.01                     | -                                | -                                    | 1.00                             | 0.00                                 | -                         | -                             | -                                      | -                                                    |
| ASN                           | 50                              | 1            | 0.93                 | 0.01                     | -                                | -                                    | 0.93                             | 0.01                                 | -                         | -                             | -                                      | -                                                    |
| LYS                           | 51                              | 4            | 0.94                 | 0.01                     | -                                | -                                    | 0.94                             | 0.01                                 | 113                       | 30                            | 0.7                                    | 0.2                                                  |
| GLU                           | 52                              | 4            | 0.89                 | 0.01                     | -                                | -                                    | 0.89                             | 0.01                                 | 1669                      | 158                           | 0.5                                    | 0.2                                                  |
| LYS                           | 53                              | 4            | 0.94                 | 0.01                     | -                                | -                                    | 0.94                             | 0.01                                 | 473                       | 118                           | 0.2                                    | 0.1                                                  |
| LEU                           | 54                              | 4            | 0.90                 | 0.01                     | -                                | -                                    | 0.90                             | 0.01                                 | 70                        | 14                            | 0.7                                    | 0.2                                                  |
| PRO                           | 55                              | -            | -                    | -                        | -                                | -                                    | -                                | -                                    | -                         | -                             | -                                      | -                                                    |
| ASN                           | 56                              | 1            | 1.00                 | 0.01                     | -                                | -                                    | 1.00                             | 0.01                                 | -                         | -                             | -                                      | -                                                    |
| GLU                           | 57                              | -            | -                    | -                        | -                                | -                                    | -                                | -                                    | -                         | -                             | -                                      | -                                                    |
| LEU                           | 58                              | 4            | 0.93                 | 0.01                     | -                                | -                                    | 0.93                             | 0.01                                 | 73                        | 11                            | 2.0                                    | 0.1                                                  |
| LYS                           | 59                              | 1            | 1.00                 | 0.01                     | -                                | -                                    | -                                | -                                    | -                         | -                             | -                                      | -                                                    |
| PRO                           | 60                              | -            | -                    | -                        | -                                | -                                    | -                                | -                                    | -                         | -                             | -                                      | -                                                    |
| LYS                           | 61                              | 4            | 0.90                 | 0.01                     | -                                | -                                    | 0.90                             | 0.01                                 | 64                        | 24                            | 1.7                                    | 0.4                                                  |
| ILE                           | 62                              | 4            | 0.96                 | 0.06                     | -                                | -                                    | 0.96                             | 0.06                                 | 546                       | 812                           | 0.6                                    | 0.9                                                  |
| ASP                           | 63                              | -            | -                    | -                        | -                                | -                                    | -                                | -                                    | -                         | -                             | -                                      | -                                                    |
| GLU                           | 64                              | 4            | 0.93                 | 0.02                     | -                                | -                                    | 0.93                             | 0.02                                 | 48                        | 21                            | 1.4                                    | 0.2                                                  |
| ILE                           | 65                              | 3            | 0.98                 | 0.01                     | -                                | -                                    | 0.98                             | 0.01                                 | -                         | -                             | 1.0                                    | 0.1                                                  |
| SER                           | 66                              | 1            | 1.00                 | 0.01                     | -                                | -                                    | 1.00                             | 0.01                                 | -                         | -                             | -                                      | -                                                    |
| LYS                           | 67                              | 4            | 0.92                 | 0.01                     | -                                | -                                    | 0.92                             | 0.01                                 | 1298                      | 194                           | 0.9                                    | 0.2                                                  |
| ARG                           | 68                              | 1            | 1.00                 | 0.01                     | -                                | -                                    | 1.00                             | 0.01                                 | -                         | -                             | -                                      | -                                                    |
| PHE                           | 69                              | 2            | 0.95                 | 0.01                     | -                                | -                                    | 0.95                             | 0.01                                 | 324                       | 196                           | -                                      | -                                                    |
| PHE                           | 70                              | 2            | 0.82                 | 0.01                     | -                                | -                                    | 0.82                             | 0.01                                 | 56                        | 7                             | -                                      | -                                                    |
| PRO                           | 71                              | -            | -                    | -                        | -                                | -                                    | -                                | -                                    | -                         | -                             | -                                      | -                                                    |
| ALA                           | 72                              | 5            | 0.33                 | 0.02                     | 0.76                             | 0.03                                 | 0.44                             | 0.03                                 | 1002                      | 41                            | -                                      | -                                                    |
| LYS                           | 73                              | 5            | 0.08                 | 0.01                     | 0.62                             | 0.01                                 | 0.14                             | 0.01                                 | 696                       | 4                             | -                                      | -                                                    |
